# Supplementary material for: Risk of breast cancer in men in relation to weight change: A national case‐control study in England and Wales
Source: PubMed Central journal article supplement (PMC9303449; doi:10.1002/ijc.33938), 2022-02-03
Supplement: IJC-150-1804-s001.pdf [file IJC-150-1804-s001.pdf]

Supplementary Material for

## **Risk of breast cancer in men in relation to weight change: a national case-control study in England and Wales**

Anthony J Swerdlow, Cydney Bruce, Rosie Cooke, Penny Coulson, Minouk J Schoemaker, Michael E Jones

Supplementary tables 1-6

**Suppl. Table 1** Risk of breast cancer in men in relation to change in relative fatness/body mass index from ages 11-20, 20-40 and 40-60 years, adjusted for baseline fatness/BMI

|                                                             | Cases No. | Controls No. | OR <sup>a</sup> | 95% CI    | P       |          |
|-------------------------------------------------------------|-----------|--------------|-----------------|-----------|---------|----------|
| <b>Change in relative fatness, age 11 to 20<sup>b</sup></b> |           |              |                 |           |         |          |
| <0                                                          | 366       | 357          | 0.81            | 0.66-0.99 | 0.04    |          |
| 0                                                           | 865       | 736          | 1.00            | Baseline  | .       |          |
| 1                                                           | 475       | 350          | 1.22            | 1.00-1.48 | 0.05    |          |
| ≥2                                                          | 102       | 53           | 1.74            | 1.15-2.63 | 0.008   |          |
| Not known                                                   | 178       | 101          | 1.41            | 1.06-1.88 | 0.02    |          |
| Trend <sup>b</sup>                                          |           |              | 1.23            | 1.10-1.37 | < 0.001 | z = 3.58 |
| <b>Change in BMI, age 20 to 40</b>                          |           |              |                 |           |         |          |
| <0                                                          | 65        | 44           | 1.12            | 0.71-1.77 | 0.63    |          |
| 0                                                           | 390       | 312          | 1.00            | Baseline  | .       |          |
| 1-2                                                         | 539       | 527          | 0.89            | 0.72-1.10 | 0.28    |          |
| 3-4                                                         | 392       | 309          | 1.13            | 0.90-1.43 | 0.29    |          |
| ≥5                                                          | 366       | 214          | 1.42            | 1.10-1.82 | 0.007   |          |
| Not known                                                   | 199       | 107          | 1.20            | 0.52-2.77 | 0.67    |          |
| Not yet age 40                                              | 47        | 84           |                 |           |         |          |
| Trend <sup>c</sup>                                          |           |              | 1.13            | 1.07-1.20 | < 0.001 | z = 4.37 |
| <b>Change in BMI, age 40 to 60</b>                          |           |              |                 |           |         |          |
| <0                                                          | 135       | 115          | 0.80            | 0.58-1.12 | 0.19    |          |
| 0                                                           | 438       | 362          | 1.00            | Baseline  | .       |          |
| 1-2                                                         | 397       | 352          | 1.02            | 0.82-1.27 | 0.89    |          |
| 3-4                                                         | 189       | 144          | 1.07            | 0.81-1.43 | 0.63    |          |
| ≥5                                                          | 156       | 64           | 1.89            | 1.32-2.71 | <0.001  |          |
| Not known                                                   | 92        | 45           | 1.95            | 0.66-5.77 | 0.23    |          |
| Not yet age 60                                              | 591       | 515          |                 |           |         |          |
| Trend <sup>c</sup>                                          |           |              | 1.14            | 1.06-1.23 | < 0.001 | z = 3.57 |

OR = Odds ratio; CI = Confidence interval; BMI = Body mass index, Kg/m<sup>2</sup>

<sup>a</sup> Adjusted for age, socioeconomic status (Acorn score (CACI, 2019)), region of residence, year of interview and marital status.

<sup>b</sup> Fatness at age 11 in 5 categories of comparison with peers. BMI at age 20 was split into categories with the percentile cut-offs between the categories matching those for controls at age 11. The change values represent moves between these categories, rather than a numerical change in BMI. Linear trend excludes 'Not known' category and is per unit increase in category.

<sup>c</sup> Linear trend excludes 'Not known' category, and is per 2 unit increase in BMI (i.e. per 1 category in the table).

**Suppl. Table 2** Risk of breast cancer in men in relation to change in waist/height ratio from age 20 to 5 years before interview, adjusted for waist/height ratio at age 20

|                                                                                 | <b>Cases<br/>No.</b> | <b>Controls<br/>No.</b> | <b>OR<sup>a</sup></b> | <b>95% CI</b> | <b>P</b> |                 |
|---------------------------------------------------------------------------------|----------------------|-------------------------|-----------------------|---------------|----------|-----------------|
| <b>Change in waist/height ratio,<br/>age 20 to 5 years before<br/>interview</b> |                      |                         |                       |               |          |                 |
| <0.00                                                                           | 25                   | 22                      | 0.83                  | 0.41-1.67     | 0.60     |                 |
| 0.00                                                                            | 150                  | 143                     | 1.00                  | Baseline      | .        |                 |
| 0.01-0.03                                                                       | 360                  | 350                     | 1.17                  | 0.87-1.58     | 0.30     |                 |
| 0.04-0.06                                                                       | 394                  | 389                     | 1.20                  | 0.89-1.62     | 0.24     |                 |
| 0.07-0.09                                                                       | 260                  | 224                     | 1.35                  | 0.97-1.87     | 0.08     |                 |
| ≥0.10                                                                           | 371                  | 192                     | 1.95                  | 1.40-2.72     | <0.001   |                 |
| Not known                                                                       | 438                  | 277                     | 1.26                  | 0.71-2.25     | 0.43     |                 |
| <b>Trend<sup>b</sup></b>                                                        |                      |                         | 1.16                  | 1.10-1.23     | <0.001   | <i>z</i> = 5.55 |

OR = Odds ratio

CI = Confidence interval

<sup>a</sup> Adjusted for age, socioeconomic status (Acorn score (CACI, 2019)), region of residence, year of interview and marital status.

<sup>b</sup> Linear trend, excluding 'Not known' category, per 0.03 units increase in waist to height ratio (i.e. per 1 category increase in the table).

**Suppl. Table 3** Risk of invasive, and of in situ, breast cancer in men in relation to change in relative fatness/body mass index from ages 11-20, 20-40, 40-60 years

|                                                             | Invasive  |              |                 |           |         | In situ   |              |                 |           |      |          |
|-------------------------------------------------------------|-----------|--------------|-----------------|-----------|---------|-----------|--------------|-----------------|-----------|------|----------|
|                                                             | Cases No. | Controls No. | OR <sup>a</sup> | 95% CI    | P       | Cases No. | Controls No. | OR <sup>a</sup> | 95% CI    | P    |          |
| <b>Change in relative fatness, age 11 to 20<sup>b</sup></b> |           |              |                 |           |         |           |              |                 |           |      |          |
| <0                                                          | 343       | 357          | 0.87            | 0.71-1.05 | 0.15    | 23        | 357          | 0.67            | 0.41-1.11 | 0.12 |          |
| 0                                                           | 732       | 736          | 1.00            | Baseline  | .       | 72        | 736          | 1.00            | Baseline  | .    |          |
| 1                                                           | 475       | 350          | 1.18            | 0.98-1.43 | 0.08    | 38        | 350          | 1.07            | 0.70-1.65 | 0.75 |          |
| ≥2                                                          | 91        | 53           | 1.61            | 1.11-2.36 | 0.01    | 11        | 53           | 2.16            | 1.04-4.49 | 0.04 |          |
| Not known                                                   | 174       | 101          | 1.48            | 1.10-1.97 | 0.009   | 16        | 101          | 1.51            | 0.82-2.81 | 0.19 |          |
| Trend <sup>b</sup>                                          |           |              | 1.18            | 1.07-1.29 | < 0.001 | z = 3.51  |              | 1.29            | 1.04-1.61 | 0.02 | z = 2.35 |
| P interaction in trends invasive/in situ <sup>d</sup>       |           |              |                 |           |         |           |              |                 |           |      | 0.34     |
| <b>Change in BMI, age 20 to 40</b>                          |           |              |                 |           |         |           |              |                 |           |      |          |
| <0                                                          | 58        | 44           | 1.22            | 0.77-1.94 | 0.39    | 7         | 44           | 2.31            | 0.90-5.93 | 0.08 |          |
| 0                                                           | 366       | 312          | 1.00            | Baseline  | .       | 24        | 312          | 1.00            | Baseline  | .    |          |
| 1-2                                                         | 494       | 527          | 0.86            | 0.70-1.06 | 0.17    | 45        | 527          | 1.04            | 0.61-1.79 | 0.89 |          |
| 3-4                                                         | 360       | 309          | 1.08            | 0.85-1.36 | 0.54    | 32        | 309          | 1.35            | 0.76-2.41 | 0.30 |          |
| ≥5                                                          | 337       | 214          | 1.35            | 1.05-1.73 | 0.02    | 29        | 214          | 1.40            | 0.76-2.59 | 0.28 |          |
| Not known                                                   | 183       | 107          | 1.40            | 1.03-1.90 | 0.03    | 16        | 107          | 1.59            | 0.78-3.27 | 0.21 |          |
| Not yet age 40                                              | 40        | 84           |                 |           |         | 7         | 84           |                 |           |      |          |
| Trend <sup>c</sup>                                          |           |              | 1.11            | 1.05-1.18 | < 0.001 | z = 3.81  |              | 1.06            | 0.92-1.21 | 0.42 | z = 0.81 |
| P interaction in trends invasive/in situ <sup>d</sup>       |           |              |                 |           |         |           |              |                 |           |      | 0.68     |

OR = Odds ratio; CI = Confidence interval; BMI = Body mass index, Kg/m<sup>2</sup>

<sup>a</sup> Adjusted for age, socioeconomic status (Acorn score (CACI, 2019)), region of residence, year of interview and marital status.

<sup>b</sup> Fatness at age 11 in 5 categories of comparison with peers. BMI at age 20 was split into categories with the percentile cut-offs between the categories matching those for controls at age 11. The change values represent moves between these categories, rather than a numerical change in BMI. Linear trend excludes 'Not known' category and is per unit increase in category.

<sup>c</sup> Linear trend excludes 'Not known' category, and is per 2 unit increase in BMI (i.e. per 1 category in the table).

<sup>d</sup> From case-case analyses.

**(Contd.) Suppl. Table 3** Risk of invasive, and of in situ, breast cancer in men in relation to change in relative fatness/body mass index from ages 11-20, 20-40, 40-60 years

|                                                       | Invasive  |              |                 |           |        | In situ         |              |                 |           |       |                 |
|-------------------------------------------------------|-----------|--------------|-----------------|-----------|--------|-----------------|--------------|-----------------|-----------|-------|-----------------|
|                                                       | Cases No. | Controls No. | OR <sup>a</sup> | 95% CI    | P      | Cases No.       | Controls No. | OR <sup>a</sup> | 95% CI    | P     |                 |
| <b>Change in BMI, age 40 to 60</b>                    |           |              |                 |           |        |                 |              |                 |           |       |                 |
| <0                                                    | 122       | 115          | 0.90            | 0.66-1.25 | 0.54   | 13              | 115          | 1.69            | 0.78-3.65 | 0.18  |                 |
| 0                                                     | 415       | 362          | 1.00            | Baseline  | .      | 23              | 362          | 1.00            | Baseline  | .     |                 |
| 1-2                                                   | 373       | 352          | 1.00            | 0.81-1.26 | 0.97   | 24              | 352          | 1.14            | 0.61-2.13 | 0.67  |                 |
| 3-4                                                   | 177       | 144          | 1.10            | 0.83-1.47 | 0.52   | 12              | 144          | 1.40            | 0.65-3.00 | 0.39  |                 |
| ≥5                                                    | 144       | 64           | 1.91            | 1.33-2.74 | <0.001 | 12              | 64           | 3.09            | 1.38-6.93 | 0.006 |                 |
| Not known                                             | 85        | 45           | 1.33            | 0.86-2.06 | 0.10   | 7               | 45           | 2.40            | 0.90-6.37 | 0.08  |                 |
| Not yet age 60                                        | 522       | 515          |                 |           |        | 69              | 515          |                 |           |       |                 |
| Trend <sup>c</sup>                                    |           |              | 1.10            | 1.02-1.18 | 0.01   | <i>z</i> = 2.61 |              | 1.09            | 0.90-1.32 | 0.21  | <i>z</i> = 0.89 |
| P interaction in trends invasive/in situ <sup>d</sup> |           |              |                 |           |        | 0.65            |              |                 |           |       |                 |

OR = Odds ratio; CI = Confidence interval; BMI = Body mass index, Kg/m<sup>2</sup>

<sup>a</sup> Adjusted for age, socioeconomic status (Acorn score (CACI, 2019)), region of residence, year of interview and marital status.

<sup>b</sup> Fatness at age 11 in 5 categories of comparison with peers. BMI at age 20 was split into categories with the percentile cut-offs between the categories matching those for controls at age 11. The change values represent moves between these categories, rather than a numerical change in BMI. Linear trend excludes 'Not known' category and is per unit increase in category.

<sup>c</sup> Linear trend excludes 'Not known' category, and is per 2 unit increase in BMI (i.e. per 1 category in the table).

<sup>d</sup> From case-case analyses.

**Suppl. Table 4** Risk of invasive, and of in situ, breast cancer in men in relation to change in waist/height ratio from age 20 to 5 years before interview

|                                                                         | Invasive  |              |                 |           |         | In situ   |              |                 |           |       |          |
|-------------------------------------------------------------------------|-----------|--------------|-----------------|-----------|---------|-----------|--------------|-----------------|-----------|-------|----------|
|                                                                         | Cases No. | Controls No. | OR <sup>a</sup> | 95% CI    | P       | Cases No. | Controls No. | OR <sup>a</sup> | 95% CI    | P     |          |
| <b>Change in waist/height ratio, age 20 to 5 years before interview</b> |           |              |                 |           |         |           |              |                 |           |       |          |
| <0.00                                                                   | 23        | 22           | 0.98            | 0.49-1.97 | 0.96    | 2         | 22           | 0.65            | 0.13-3.23 | 0.60  |          |
| 0.00                                                                    | 131       | 143          | 1.00            | Baseline  | .       | 19        | 143          | 1.00            | Baseline  | .     |          |
| 0.01-0.03                                                               | 329       | 350          | 1.20            | 0.88-1.64 | 0.25    | 31        | 350          | 0.67            | 0.36-1.27 | 0.22  |          |
| 0.04-0.06                                                               | 367       | 389          | 1.21            | 0.89-1.65 | 0.22    | 27        | 389          | 0.53            | 0.28-1.01 | 0.06  |          |
| 0.07-0.09                                                               | 240       | 224          | 1.33            | 0.95-1.86 | 0.09    | 20        | 224          | 0.78            | 0.39-1.56 | 0.48  |          |
| ≥0.10                                                                   | 336       | 192          | 1.83            | 1.32-2.54 | <0.001  | 35        | 192          | 1.54            | 0.82-2.92 | 0.18  |          |
| Not known                                                               | 412       | 277          | 1.72            | 1.18-2.49 | 0.005   | 26        | 277          | 0.67            | 0.29-1.58 | 0.36  |          |
| Trend <sup>b</sup>                                                      |           |              | 1.13            | 1.08-1.19 | < 0.001 | z = 4.80  |              | 1.17            | 1.04-1.31 | 0.009 | z = 2.61 |
| P interaction in trends invasive/in situ <sup>c</sup>                   |           |              |                 |           |         |           |              |                 |           |       | 0.57     |

OR = Odds ratio

CI = Confidence interval

<sup>a</sup> Adjusted for age, socioeconomic status (Acorn score (CACI, 2019)), region of residence, year of interview and marital status.

<sup>b</sup> Linear trend, excluding 'Not known' category, per 0.03 units increase in waist to height ratio (i.e. per 1 category increase in the table).

<sup>c</sup> From case-case analyses.

**Suppl. Table 5** Risk of breast cancer in men in relation to change in relative fatness/body mass index from ages 11-20, 20-40, 40-60 years, by HER-2 expression status

|                                                             | HER-2 Positive |              |                 |           |      | HER-2 Negative |              |                 |           |         |          |          |
|-------------------------------------------------------------|----------------|--------------|-----------------|-----------|------|----------------|--------------|-----------------|-----------|---------|----------|----------|
|                                                             | Cases No.      | Controls No. | OR <sup>a</sup> | 95% CI    | P    | Cases No.      | Controls No. | OR <sup>a</sup> | 95% CI    | P       |          |          |
| <b>Change in relative fatness, age 11 to 20<sup>b</sup></b> |                |              |                 |           |      |                |              |                 |           |         |          |          |
| <0                                                          | 34             | 357          | 0.80            | 0.51-1.25 | 0.32 | 262            | 357          | 0.88            | 0.71-1.08 | 0.23    |          |          |
| 0                                                           | 89             | 736          | 1.00            | Baseline  | .    | 601            | 736          | 1.00            | Baseline  | .       |          |          |
| 1                                                           | 40             | 350          | 0.91            | 0.59-1.39 | 0.65 | 331            | 350          | 1.21            | 0.99-1.48 | 0.06    |          |          |
| ≥2                                                          | 13             | 53           | 2.45            | 1.22-4.91 | 0.01 | 70             | 53           | 1.67            | 1.12-2.49 | 0.01    |          |          |
| Not known                                                   | 12             | 101          | 1.06            | 0.52-2.16 | 0.86 | 128            | 101          | 1.48            | 1.08-2.01 | 0.01    |          |          |
| Trend <sup>b</sup>                                          |                |              | 1.17            | 0.95-1.44 | 0.14 |                |              | 1.19            | 1.08-1.31 | < 0.001 | z = 1.49 | z = 3.52 |
| P interaction in trends<br>HER-2 +ve/-ve <sup>d</sup>       |                |              |                 |           |      |                |              |                 |           |         | 0.84     |          |
| <b>Change in BMI, age 20 to 40</b>                          |                |              |                 |           |      |                |              |                 |           |         |          |          |
| <0                                                          | 7              | 44           | 1.58            | 0.61-4.09 | 0.35 | 48             | 44           | 1.24            | 0.77-2.00 | 0.38    |          |          |
| 0                                                           | 36             | 312          | 1.00            | Baseline  | .    | 288            | 312          | 1.00            | Baseline  | .       |          |          |
| 1-2                                                         | 54             | 527          | 0.96            | 0.59-1.57 | 0.89 | 356            | 527          | 0.80            | 0.64-1.01 | 0.06    |          |          |
| 3-4                                                         | 32             | 309          | 0.98            | 0.57-1.70 | 0.94 | 282            | 309          | 1.09            | 0.85-1.39 | 0.51    |          |          |
| ≥5                                                          | 41             | 214          | 1.85            | 1.08-3.18 | 0.03 | 250            | 214          | 1.26            | 0.97-1.65 | 0.09    |          |          |
| Not known                                                   | 15             | 107          | 1.46            | 0.71-2.97 | 0.30 | 137            | 107          | 1.34            | 0.97-1.86 | 0.08    |          |          |
| Not yet age 40                                              | 3              | 84           |                 |           |      | 31             | 84           |                 |           |         |          |          |
| Trend <sup>c</sup>                                          |                |              | 1.18            | 1.04-1.34 | 0.01 |                |              | 1.11            | 1.04-1.17 | < 0.001 | z = 2.58 | z = 3.37 |
| P interaction in trends<br>HER-2 +ve/-ve <sup>d</sup>       |                |              |                 |           |      |                |              |                 |           |         | 0.63     |          |

OR = Odds ratio; CI = Confidence interval; BMI = Body mass index, Kg/m<sup>2</sup>

<sup>a</sup> Adjusted for age, socioeconomic status (Acorn score (CACI, 2019)), region of residence, year of interview and marital status.

<sup>b</sup> Fatness at age 11 in 5 categories of comparison with peers. BMI at age 20 was split into categories with the percentile cut-offs between the categories matching those for controls at age 11. The change values represent moves between these categories, rather than a numerical change in BMI. Linear trend excludes 'Not known' category and is per unit increase in category.

<sup>c</sup> Linear trend excludes 'Not known' category, and is per 2 unit increase in BMI (i.e. per 1 category in the table).

<sup>d</sup> From case-case analyses.

**(Contd.) Suppl. Table 5** Risk of breast cancer in men in relation to change in relative fatness/body mass index from ages 11-20, 20-40, 40-60 years, by HER-2 expression status

|                                                       | HER-2 Positive |                 |                 |           |      | HER-2 Negative |                 |                 |           |         |          |
|-------------------------------------------------------|----------------|-----------------|-----------------|-----------|------|----------------|-----------------|-----------------|-----------|---------|----------|
|                                                       | Cases<br>No.   | Controls<br>No. | OR <sup>a</sup> | 95% CI    | P    | Cases<br>No.   | Controls<br>No. | OR <sup>a</sup> | 95% CI    | P       |          |
| <b>Change in BMI, age 40 to 60</b>                    |                |                 |                 |           |      |                |                 |                 |           |         |          |
| <0                                                    | 15             | 115             | 0.96            | 0.48-1.90 | 0.90 | 91             | 115             | 0.92            | 0.65-1.30 | 0.63    |          |
| 0                                                     | 53             | 362             | 1.00            | Baseline  | .    | 304            | 362             | 1.00            | Baseline  | .       |          |
| 1-2                                                   | 26             | 352             | 0.62            | 0.36-1.06 | 0.08 | 290            | 352             | 1.05            | 0.83-1.33 | 0.68    |          |
| 3-4                                                   | 15             | 144             | 0.72            | 0.36-1.43 | 0.35 | 143            | 144             | 1.22            | 0.90-1.65 | 0.19    |          |
| ≥5                                                    | 16             | 64              | 2.12            | 1.05-4.27 | 0.04 | 113            | 64              | 2.05            | 1.41-2.99 | <0.001  |          |
| Not known                                             | 4              | 45              | 0.94            | 0.31-2.82 | 0.91 | 65             | 45              | 1.40            | 0.88-2.22 | 0.15    |          |
| Not yet age 60                                        | 59             | 515             |                 |           |      | 387            | 515             |                 |           |         |          |
| Trend <sup>c</sup>                                    |                |                 | 1.00            | 0.84-1.19 | 0.98 |                |                 | 1.15            | 1.06-1.24 | < 0.001 | z = 3.49 |
| P interaction in trends<br>HER-2 +ve/-ve <sup>d</sup> |                |                 |                 |           |      |                |                 |                 |           |         | 0.12     |

OR = Odds ratio; CI = Confidence interval; BMI = Body mass index, Kg/m<sup>2</sup>

<sup>a</sup> Adjusted for age, socioeconomic status (Acorn score (CACI, 2019)), region of residence, year of interview and marital status.

<sup>b</sup> Fatness at age 11 in 5 categories of comparison with peers. BMI at age 20 was split into categories with the percentile cut-offs between the categories matching those for controls at age 11. The change values represent moves between these categories, rather than a numerical change in BMI. Linear trend excludes 'Not known' category and is per unit increase in category.

<sup>c</sup> Linear trend excludes 'Not known' category, and is per 2 unit increase in BMI (i.e. per 1 category in the table).

<sup>d</sup> From case-case analyses.

**Suppl. Table 6** Risk of breast cancer in men in relation to change in waist/height ratio from age 20 to 5 years before interview, by HER-2 expression status

|                                                                         | HER-2 Positive |              |                 |            |      | HER-2 Negative  |              |                 |            |         |                 |
|-------------------------------------------------------------------------|----------------|--------------|-----------------|------------|------|-----------------|--------------|-----------------|------------|---------|-----------------|
|                                                                         | Cases No.      | Controls No. | OR <sup>a</sup> | 95% CI     | P    | Cases No.       | Controls No. | OR <sup>a</sup> | 95% CI     | P       |                 |
| <b>Change in waist/height ratio, age 20 to 5 years before interview</b> |                |              |                 |            |      |                 |              |                 |            |         |                 |
| <0.00                                                                   | 4              | 22           | 1.27            | 0.36- 4.54 | 0.71 | 17              | 22           | 1.08            | 0.51- 2.28 | 0.85    |                 |
| 0.00                                                                    | 18             | 143          | 1.00            | Baseline   | .    | 100             | 143          | 1.00            | Baseline   | .       |                 |
| 0.01-0.03                                                               | 34             | 350          | 0.75            | 0.39- 1.45 | 0.39 | 258             | 350          | 1.30            | 0.93- 1.81 | 0.12    |                 |
| 0.04-0.06                                                               | 34             | 389          | 0.63            | 0.33- 1.22 | 0.17 | 306             | 389          | 1.36            | 0.98- 1.88 | 0.07    |                 |
| 0.07-0.09                                                               | 24             | 224          | 0.72            | 0.35- 1.46 | 0.36 | 192             | 224          | 1.48            | 1.04- 2.11 | 0.03    |                 |
| ≥0.10                                                                   | 38             | 192          | 1.32            | 0.68- 2.54 | 0.41 | 261             | 192          | 1.93            | 1.36- 2.73 | <0.001  |                 |
| Not known                                                               | 36             | 277          | 1.01            | 0.45- 2.26 | 0.98 | 258             | 277          | 1.87            | 1.26- 2.78 | 0.002   |                 |
| Trend <sup>b</sup>                                                      |                |              | 1.08            | 0.97-1.21  | 0.16 | <i>z</i> = 1.41 |              | 1.14            | 1.08-1.20  | < 0.001 | <i>z</i> = 4.65 |
| P interaction in trends<br>HER-2 +ve/-ve <sup>c</sup>                   |                |              |                 |            |      |                 |              |                 |            |         | 0.35            |

OR = Odds ratio

CI = Confidence interval

<sup>a</sup> Adjusted for age, socioeconomic status (Acorn score (CACI, 2019)), region of residence, year of interview and marital status.

<sup>b</sup> Linear trend, excluding 'Not known' category, per 0.03 units increase in waist to height ratio (i.e. per 1 category increase in the table).

<sup>c</sup> From case-case analyses.
